# Supplementary material for: Biocompatibility of ABS and PLA Polymers with Dental Pulp Stem Cells Enhance Their Potential Biomedical Applications
Source: MDPI journal article supplement (doi:10.3390/polym15244629), 2023-12-06
Supplement: s1 [file s1]

## Supplementary Materials:

**Table S1.** This table presents information on the donor's age, sex, number of days and cell concentration at the time of the first passage.

| Samples                              | A                    | B                   | C                    | Average              |
|--------------------------------------|----------------------|---------------------|----------------------|----------------------|
| Age                                  | 20                   | 24                  | 15                   | 19,6                 |
| Gender                               | feminine             | feminine            | male                 | -                    |
| Cultivation days for first pass      | 25                   | 17                  | 10                   | 17                   |
| Cell concentration in the first pass | 1.95x10 <sup>6</sup> | 4.8x10 <sup>6</sup> | 4.85x10 <sup>6</sup> | 3.86x10 <sup>6</sup> |

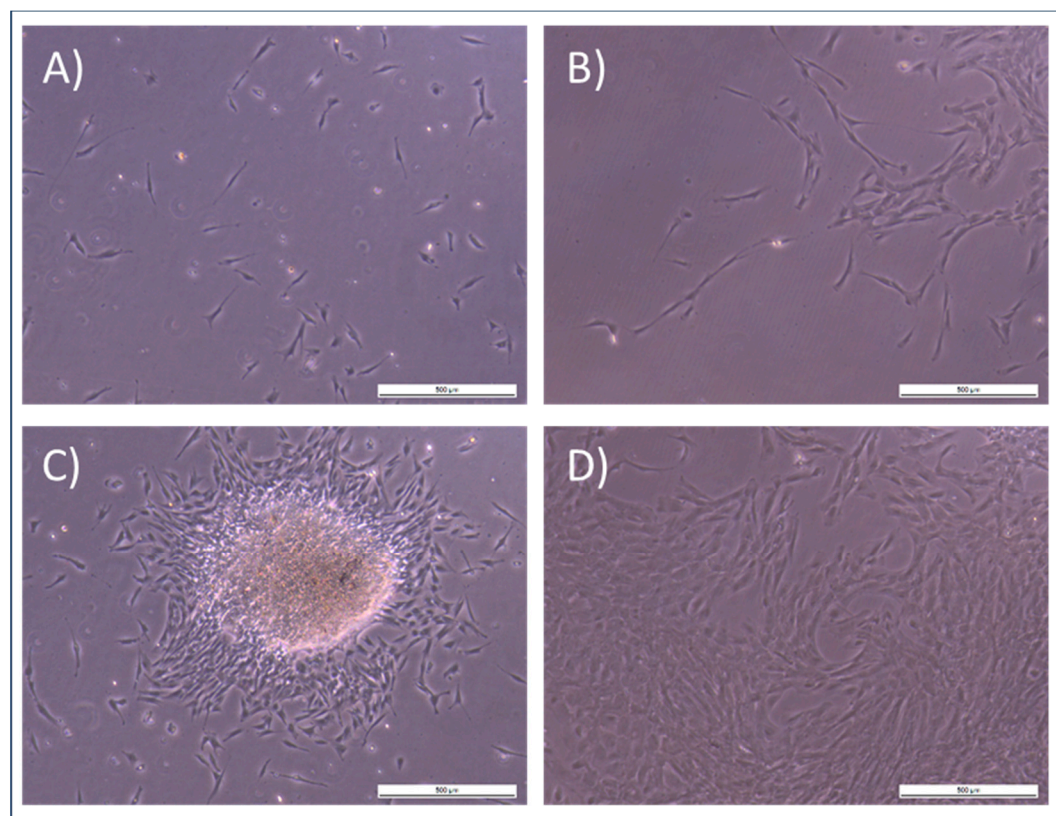

**Figure S1.** Representative photomicrographs of cell culture, adherence to plastic and fibroblastoid morphology were observed throughout cell culture. A) Beginning of cell adhesion. B) Cells adhered to the culture flask and beginning of cell proliferation (Day 5). C) Proliferation of cells in colonies (Day 10). D) Aspect of cell culture with confluence greater than 80% (Day 17), when the passages were carried out. (50X magnification, scale bar: 500 µm).

**Table S2.** Comparison by the Friedman test of the median and quartile obtained in the bioluminescence analyses comparing the days of intragroup analysis.

|                 |       | Median | Q25    | Q75    | <i>p</i> |
|-----------------|-------|--------|--------|--------|----------|
| Group DPSC      | Day 2 | 5.70E6 | 4.57E6 | 2.59E7 | <0.001   |
|                 | Day 3 | 1.81E6 | 1.26E6 | 1.27E7 |          |
|                 | Day 4 | 6.39E6 | 3.12E6 | 1.78E7 |          |
|                 | Day 5 | 1.29E7 | 6.24E6 | 3.04E7 |          |
|                 | Day 6 | 3.34E7 | 1.17E7 | 8.45E7 |          |
|                 | Day 7 | 7.17E7 | 2.45E7 | 1.38E8 |          |
| Group DPSC+ ABS | Day 2 | 1.12E7 | 9.54E6 | 1.32E7 | <0.001   |
|                 | Day 3 | 2.40E6 | 1.44E6 | 5.66E6 |          |
|                 | Day 4 | 5.65E6 | 2.43E6 | 7.76E6 |          |
|                 | Day 5 | 1.13E7 | 5.07E6 | 1.42E7 |          |
|                 | Day 6 | 2.83E7 | 8.91E6 | 3.64E7 |          |
|                 | Day 7 | 5.84E7 | 1.80E7 | 9.72E7 |          |
| Group DPSC+ PLA | Day 2 | 1.48E7 | 1.08E7 | 1.94E7 | <0.001   |
|                 | Day 3 | 2.83E6 | 2.15E6 | 1.05E7 |          |
|                 | Day 4 | 6.34E6 | 2.14E6 | 1.04E7 |          |
|                 | Day 5 | 1.33E7 | 4.31E6 | 1.61E7 |          |
|                 | Day 6 | 3.51E7 | 8.15E6 | 4.06E7 |          |
|                 | Day 7 | 7.39E7 | 1.75E7 | 9.48E7 |          |

**Table S3.** Comparison by the Kruskal-Wallis test of the median and quartile obtained in the bioluminescence analyses comparing the groups on different days of analysis.

|          | Median | Q25    | Q75    | <i>p</i> |
|----------|--------|--------|--------|----------|
| Day 2    |        |        |        |          |
| DPSC     | 5.7E6  | 4.57E6 | 2.59E7 | <0.155   |
| DPSC+ABS | 1.12E7 | 9.54E6 | 1.32E7 |          |
| DPSC+PLA | 1.48E7 | 1.08E7 | 1.94E7 |          |
| Day 3    |        |        |        |          |
| DPSC     | 1.81E6 | 1.26E6 | 1.27E7 | 0.546    |
| DPSC+ABS | 2.40E6 | 1.44E6 | 5.66E6 |          |
| DPSC+PLA | 2.83E6 | 2.15E6 | 1.05E7 |          |
| Day 4    |        |        |        |          |
| DPSC     | 6.39E6 | 3.12E6 | 1.78E7 | 0.713    |
| DPSC+ABS | 5.65E6 | 2.43E6 | 7.76E6 |          |
| DPSC+PLA | 6.34E6 | 2.14E6 | 1.04E7 |          |
| Day 5    |        |        |        |          |
| DPSC     | 1.29E7 | 6.24E6 | 3.04E7 | 0.597    |
| DPSC+ABS | 1.13E7 | 5.07E6 | 1.42E7 |          |
| DPSC+PLA | 1.33E7 | 4.31E6 | 1.61E7 |          |
| Day 6    |        |        |        |          |
| DPSC     | 3.34E7 | 1.17E7 | 8.45E7 | 0.601    |
| DPSC+ABS | 2.83E7 | 8.91E6 | 3.64E7 |          |
| DPSC+PLA | 3.51E7 | 8.15E6 | 4.06E7 |          |
| Day 7    |        |        |        |          |
| DPSC     | 7.17E7 | 2.45E7 | 1.38E8 | 0.589    |
| DPSC+ABS | 5.84E7 | 1.80E7 | 9.72E7 |          |
| DPSC+PLA | 7.39E7 | 1.75E7 | 9.48E7 |          |

**Table S4.** Comparison by the Wilcoxon between the *p* values obtained from the variables on intragroup days in the bioluminescence analyses.

| Days          | <i>p</i> |
|---------------|----------|
| Day 2 x Day 3 | 0.008    |
| Day 2 x Day 4 | 0.051    |
| Day 2 x Day 5 | 0.008    |
| Day 2 x Day 6 | 0.008    |
| Day 2 x Day 7 | 0.008    |
| Day 3 x Day 4 | 0.008    |
| Day 3 x Day 5 | 0.008    |
| Day 3 x Day 6 | 0.008    |
| Day 3 x Day 7 | 0.008    |
| Day 4 x Day 5 | 0.008    |
| Day 4 x Day 6 | 0.008    |
| Day 4 x Day 7 | 0.008    |
| Day 5 x Day 6 | 0.008    |
| Day 5 x Day 7 | 0.008    |
| Day 6 x Day 7 | 0.008    |

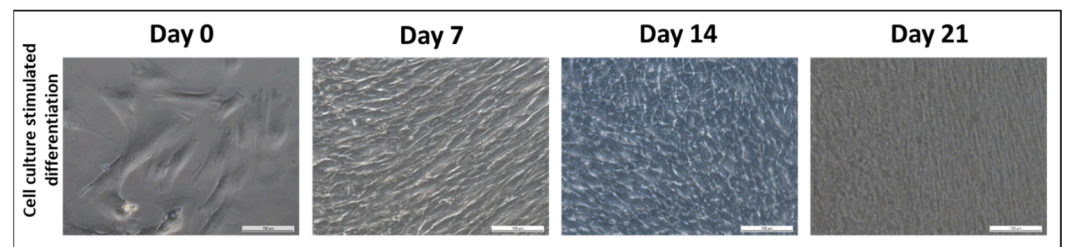

**Figure S2.** Photomicrographs of cell differentiation. A) Morphological monitoring of DPSC during stimulation of osteogenic differentiation (0, 7, 14 and 21 days) cultured on a coverslip (magnification 100x, scale bar: 100  $\mu$ m).

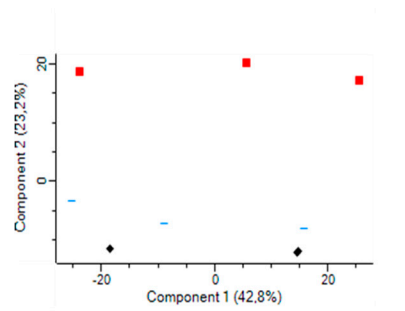

**Figure S3.** Principal component analysis (PCA) of the protein samples analyzed using the Perseus software. The red squares represent the control samples, the black diamonds the ABS samples and the blue horizontal lines the PLA samples. Note that two black diamonds are overlapping (n=3).

**Table S5.** Raw data. Proteins groups used for FunRich and Perseus analyses.  
Available in: [https://docs.google.com/spreadsheets/d/1NUbN9lOu--r4hJGQ6JBfMw17W5OIK\\_6D/edit?usp=sharing&oid=108025814496751279025&rtpof=true&sd=true](https://docs.google.com/spreadsheets/d/1NUbN9lOu--r4hJGQ6JBfMw17W5OIK_6D/edit?usp=sharing&oid=108025814496751279025&rtpof=true&sd=true)
